# Supplementary material for: An expanded tool kit for the auxin-inducible degron system in budding yeast
Source: PubMed Central journal article supplement — Yeast. 2013 Jul 23;30(9):341–51. doi: 10.1002/yea.2967 (PMC4171812; doi:10.1002/yea.2967), 2013-07-23
Supplement: yea0030-0341-SD1.pdf [file yea0030-0341-SD1.pdf]

## Supporting Information

### An expanded toolbox for the auxin-inducible degron system in budding yeast

Magdalena Morawska and Helle D. Ulrich\*

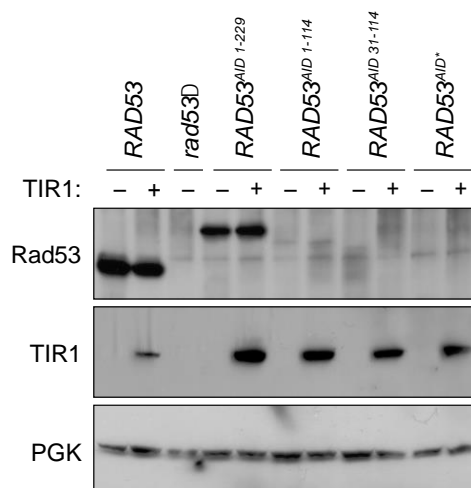

**Figure S1.** TIR1 is not responsible for the auxin-independent destabilisation of Rad53 by the AID-tags. Protein levels of Rad53 carrying variations of the AID-tag in comparison with the native protein were examined in strains either containing or lacking TIR1 as indicated. All cultures were grown in the absence of auxin before preparation of the lysates, and proteins were detected by Western blotting with the indicated antibodies.

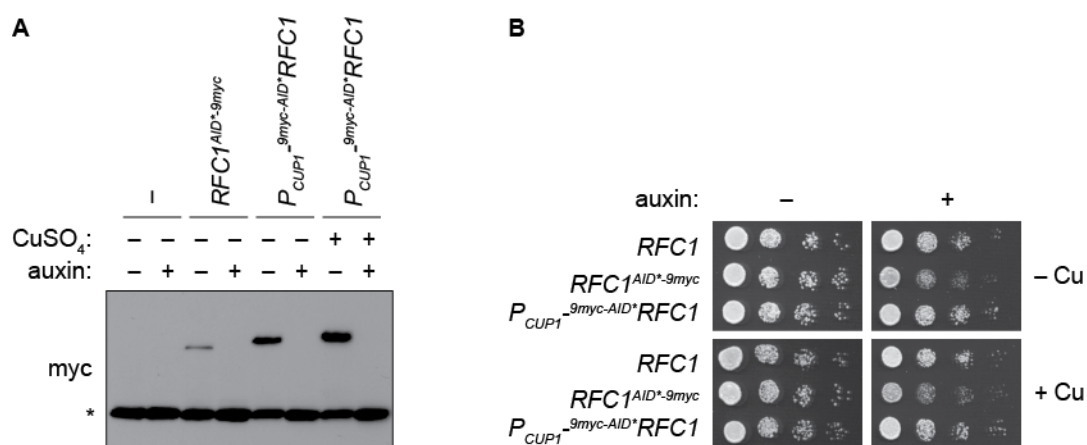

**Figure S2.** The position of the AID\*-tag has little influence on degradation efficiency in the case of *RFC1*. (A) Western blot analysis showing protein levels of C- and N-terminally AID\*-tagged Rfc1 in the presence or absence of 1 mM auxin. 1 mM CuSO<sub>4</sub> was added where indicated in order to enhance expression of *P<sub>CUP1</sub><sup>9myc-AID\*</sup>RFC1*. (B) Auxin sensitivity assays of the indicated strains in the presence or absence of 1 mM auxin and 1 mM CuSO<sub>4</sub> (Cu).

**Table S1.** Sequences of oligonucleotides used in this study

| Primer | Name                  | Sequence (5' to 3')                                                           |
|--------|-----------------------|-------------------------------------------------------------------------------|
| 97     | MMS2 tag down         | CCAGCGAACAAGAAATTGCGTCAACCGAAGGAAGGAGAAACCTTT<br>CGTACGCTGCAGGTCGAC           |
| 98     | MMS2 tag up           | AGTGGCTTGGAAATGCTGCAAATACTGTTTAGGAAAAAGTAGATAAA<br>TCGATGAATTCGAGCTCG         |
| 119    | UBC13 tag down        | AAGGCTCGCGAATGGACGAAATGTATGCAAAGAAGAAACCCGAG<br>CGTACGCTGCAGGTCGAC            |
| 120    | UBC13 tag up          | GATATATATTTATATATTCAGTTGAGAAAACCTTATACAGAAATGAA<br>TCGATGAATTCGAGCTCG         |
| 311    | RFA1 tag down         | GAAGCCGACTATCTTGCCGATGAGTTATCCAAGGCTTTGTTAGCTCG<br>TACGCTGCAGGTCGAC           |
| 312    | RFA1 tag up           | TCTCATATGTTACATAGATTAATAGTACTTGATTATTTGATACAAT<br>CGATGAATTCGAGCTCG           |
| 592    | RAD53 ko down         | TCTCATATGTTACATAGATTAATAGTACTTGATTATTTGATACAAT<br>CGATGAATTCGAGCTCG           |
| 593    | RAD53 ko up           | ATCTTCTCTCTTAAAAAGGGGCAGCATTTTCTATGGGTATTTGTCCT<br>TGGATCGATGAATTCGAGCTCG     |
| 1135   | RFC1 tag down         | GACTGCCACCAGTAAACCTGGTGGTAGCAAAAAAAGGAAAACGAA<br>AGCACGTACGCTGCAGGTCGAC       |
| 1136   | RFC1 tag up           | CAATGAGAAGAAAAGTGTAATTATAATCTTAGTGTATGAATAAATC<br>AATCGATGAATTCGAGCTCG        |
| 1150   | POL1 tag down         | GGACGTCGCTACGTTGATATGACTAGCATATTTGATTTTCATGCTAAA<br>TCGTACGCTGCAGGTCGAC       |
| 1151   | POL1 tag up           | CTATATAGAATATTCATGAGATCACACAACACATACAAAATACTTA<br>CCTAATCGATGAATTCGAGCTCG     |
| 1194   | ORC6 tag down         | ATATTTGGAAGAAAAGAATTGAAATGGATTGGCATTAAACAGAACC<br>TTTACGTACGCTGCAGGTCGAC      |
| 1195   | ORC6 tag up           | ATGTCAGGTATTTGGTCAAATATATACTTTTAGTTAATACTGGATATG<br>TTAATCGATGAATTCGAGCTCG    |
| 1335   | POL31 tag down        | TATTACTGGATTTGGAAACGTTAGAAGCAGAGACGGTCAAGATTGA<br>CATTCTGACGCTGCAGGTCGAC      |
| 1336   | POL31 tag up          | ACATATAAACTTAATTGCATATCTATGTGGAAATTATTCCTTGTTT<br>TATATCGATGAATTCGAGCTCG      |
| 1633   | POL2 tag up           | TTTTTCATGGTAAAGAGGCCATTGAACCTCGCGTTATATACTGCTTA<br>CATCGATGAATTCGAGCTCG       |
| 1772   | AID KpnI down         | AGGTACCATGATGGGCAGTGTCG                                                       |
| 1773   | AID(114-STOP) XmaI up | CTCCCCCGGGTGATCACTTCACGAACGCCGC                                               |
| 1774   | AID(114) XmaI up      | CTCCCCCGGGTGATCACTTCACGAACGCCGC                                               |
| 1787   | AID* KpnI down        | TGGTACCCTAAAGATCCAGCCAAACC                                                    |
| 1788   | AID(31) KpnI down     | CCGTACCAAGAGAGGGTTCTCAGAGACG                                                  |
| 1790   | 9myc-STOP up          | GATGGCGCGCCTTTTAGCTAGTGGATCCGTTT                                              |
| 1792   | Rad53 tag down        | GGGCAAAATTGGACCAAACCTCAAAGGCCCCGAGAATTTGCAATT<br>TTCGCTACGCTGCAGGTCGAC        |
| 1795   | 9myc XmaI down        | CGGCCCGGGGCTAGTGGTGAACAAAAG                                                   |
| 1798   | POL2 tag down         | AGTATTACGGTTTTGATATATTATTGAGTTGTATTGCTGATTTGACC<br>ATACGTACGCTGCAGGTCGAC      |
| 1992   | 9myc up               | TTCTTCTCGAGGCTAGTGGATCCGTTCAA                                                 |
| 1993   | AID* XhoI up          | GGTTCCTCGAGCATTGATACCTTCACGAACGCCGC                                           |
| 1996   | AID*-ATG EcoRI down   | GAAGGAATTCATGCCTAAAGATCCAGCCAAACC                                             |
| 2016   | RFC1 tag(N) down      | TAATTTATAAATCAAGTCACCTCATAATAAACTAAGCTGAAGAA<br>AATGCGTACGCTGCAGGTCGAC        |
| 2039   | N-AID-NheI down       | CCGCTCTAGAACTAGTGCTAGCCATTACCGACATTTGG                                        |
| 2040   | N-AID-NheI up         | CCAAATGTCGGTAATGGCTAGCACTAGTTCTAGAGCGG                                        |
| 2064   | 9myc EcoRI down       | AATCGAATTCATGTCGGTTCTGCTGCTAGTGG                                              |
| 2065   | 9myc EcoRI up         | GATCGTTCCTACTGAATTCCTAGTGGATCCGTTCAAGTCTTC                                    |
| 2066   | RFA1 tag(N) down      | ACGGTAAAGGCGAAACCAGCAAGAAGACCAGATTATACTTACAAG<br>AGCGTACGCTGCAGGTCGAC         |
| 2067   | RFA1 tag(N) up        | TTATTGGTGAAGATGCTATGAAAATCGCCCCTCGAAAGTTGAACAC<br>TGCTAAGCTGGTACCGACTCTGG     |
| 2068   | RFA1 tag(N)+ATG up    | TTATTGGTGAAGATGCTATGAAAATCGCCCCTCGAAAGTTGAACAC<br>TGCTCATAAGCTGGTACCGAGCTCTGG |
| 2069   | 6HA down              | CGGCCCGGGAAATACCCATACGATGTTCTGACTATGC                                         |
| 2070   | 6HA up                | GATGGCGCGCCTTTTAAAGCGTAATCTGGAACGTCATATGG                                     |

|      |                        |                                                                            |
|------|------------------------|----------------------------------------------------------------------------|
| 2071 | 6FLAG down             | CCGCCCCGGGATACATTATACGAAGTTATGCATGCTCACT                                   |
| 2072 | 6FLAG up               | ATTTAGAAGTGGCGCGCC                                                         |
| 2073 | yEGFP down             | CGGCCCGGGAAAGTGAGCAAGGGCGAGGAGCTGTTACC                                     |
| 2074 | yEGFP up               | GATGGCGCGCCTTTTACTTGTACAGCTCGTCCATGCC                                      |
| 2185 | N-AID-PmlI down        | GATATTAAGAAAAACAACTGTACACGTGTCATGTCCGGTCTGC                                |
| 2186 | N-AID-PmlI up          | GCAGAACCGGACATGACACGTGTACAGTTTGTCTTCTTAATATC                               |
| 2189 | P <sub>REF1</sub> up   | CTGCACGTGTCTTGTAAAGTATAATCTGGTCTTCTTGC                                     |
| 2190 | P <sub>REF1</sub> down | AAAAGCTAGCTCGCCTTTTGCCGTTCTTTTGC                                           |
| 2276 | YEN1 tag up            | TCGGCGCGATCAACTGTGGTGGCGGATTTTTGACGCTGTGCCCGTT<br>AACATCGATGAATTCGAGCTCG   |
| 2388 | ASK1 tag down          | AAGAAGTACCAAAGCCTGGGACCATCATTCAATTTTTCTACGAATAG<br>ACGTACGCTGCAGGTCGAC     |
| 2389 | ASK1 tag up            | CCTGCGTTCTGATATTCATCACTAGTAAAAATTGTATGTACTTATT<br>ATTATCGATGAATTCGAGCTCG   |
| 2394 | RFC1 tag(N) up         | GACGATCTTACGGATTTCTTATTTTTACCAAAGAAATCAGAAATATT<br>GACAAGCTGGTACCGAGCTCTGG |
| 2419 | SEC14 tag down         | AGTATATTGGACCGGAAGGTGAAGCTCCGGAAGCCTTTTCGATGAA<br>ACGTACGCTGCAGGTCGAC      |
| 2420 | SEC14 tag up           | TTAGAACTCCTCTTTTCTCTCTCGAAAAAAAAAATGTCTTAAAAATA<br>ATAATCGATGAATTCGAGCTCG  |
| 2424 | YEN1 tag down          | CAGTCGACCGTTTGTAGCCTGTGACAGTGATAGCAGTAGCACTAT<br>TGAACGTACGCTGCAGGTCGAC    |

Oligonucleotides labelled “tag” or “ko” are used for PCR-mediated epitope-tagging or gene deletion, respectively.

**Table S2.** Yeast Strains used in this study

| Strain                                                          | Genotype                                                                                                                                                  | Reference                     |
|-----------------------------------------------------------------|-----------------------------------------------------------------------------------------------------------------------------------------------------------|-------------------------------|
| <i>WT (DF5)</i>                                                 | <i>Mata his3-A200 leu2-3,2-112 lys2-801 trp1-1 ura3-52</i>                                                                                                | (Finley <i>et al.</i> , 1987) |
| <i>TIR1 Tet-RAD18 BrdU</i>                                      | <i>DF5 KanMX::TetO7-RAD18 LEU2::TetR'-SSN6 TRP::BrdU-inc URA3::ADH1-AtTIR1<sup>9myc</sup></i>                                                             | This study                    |
| <i>TIR1 Tet-Rad18 BrdU sml1</i>                                 | <i>DF5 KanMX::TetO7-RAD18 LEU2::TetR'-SSN6 TRP::BrdU-inc URA3::ADH1-AtTIR1<sup>9myc</sup> sml1Δ::hisG-URA3-hisG</i>                                       | This study                    |
| <i>TIR1 Tet-Rad18 BrdU sml1 rad53</i>                           | <i>DF5 KanMX::TetO7-RAD18 LEU2::TetR'-SSN6 TRP::BrdU-inc URA3::ADH1-AtTIR1<sup>9myc</sup> sml1Δ::hisG-URA3-hisG rad53Δ::HIS3MX</i>                        | This study                    |
| <i>TIR1 Tet-Rad18 BrdU sml1 RAD53<sup>AID 1-229</sup></i>       | <i>DF5 KanMX::TetO7-RAD18 LEU2::TetR'-SSN6 TRP::BrdU-inc URA3::ADH1-AtTIR1<sup>9myc</sup> sml1Δ::hisG-URA3-hisG RAD53<sup>AID 1-229</sup>::hphB</i>       | This study                    |
| <i>TIR1 Tet-Rad18 BrdU sml1 RAD53<sup>AID 1-114</sup></i>       | <i>DF5 KanMX::TetO7-RAD18 LEU2::TetR'-SSN6 TRP::BrdU-inc URA3::ADH1-AtTIR1<sup>9myc</sup> sml1Δ::hisG-URA3-hisG RAD53<sup>AID 1-114</sup>::hphB</i>       | This study                    |
| <i>TIR1 Tet-Rad18 BrdU sml1 RAD53<sup>AID 31-114</sup></i>      | <i>DF5 KanMX::TetO7-RAD18 LEU2::TetR'-SSN6 TRP::BrdU-inc URA3::ADH1-AtTIR1<sup>9myc</sup> sml1Δ::hisG-URA3-hisG RAD53<sup>AID 31-114</sup>::hphB</i>      | This study                    |
| <i>TIR1 Tet-Rad18 BrdU sml1 RAD53<sup>AID*</sup></i>            | <i>DF5 KanMX::TetO7-RAD18 LEU2::TetR'-SSN6 TRP::BrdU-inc URA3::ADH1-AtTIR1<sup>9myc</sup> sml1Δ::hisG-URA3-hisG RAD53<sup>AID*</sup>::hphB</i>            | This study                    |
| <i>TIR1 Tet-Rad18 BrdU sml1 RAD53<sup>AID 1-114-8myc</sup></i>  | <i>DF5 KanMX::TetO7-RAD18 LEU2::TetR'-SSN6 TRP::BrdU-inc URA3::ADH1-AtTIR1<sup>9myc</sup> sml1Δ::hisG-URA3-hisG RAD53<sup>AID 1-114-8myc</sup>::hphB</i>  | This study                    |
| <i>TIR1 Tet-Rad18 BrdU sml1 RAD53<sup>AID 31-114-9myc</sup></i> | <i>DF5 KanMX::TetO7-RAD18 LEU2::TetR'-SSN6 TRP::BrdU-inc URA3::ADH1-AtTIR1<sup>9myc</sup> sml1Δ::hisG-URA3-hisG RAD53<sup>AID 31-114-9myc</sup>::hphB</i> | This study                    |
| <i>TIR1 Tet-Rad18 BrdU sml1 RAD53<sup>AID*-9myc</sup></i>       | <i>DF5 KanMX::TetO7-RAD18 LEU2::TetR'-SSN6 TRP::BrdU-inc URA3::ADH1-AtTIR1<sup>9myc</sup> sml1Δ::hisG-URA3-hisG RAD53<sup>AID*-9myc</sup>::hphB</i>       | This study                    |
| <i>TIR1</i>                                                     | <i>DF5 URA3:: ADH1-AtTIR1<sup>9myc</sup></i>                                                                                                              | This study                    |
| <i>TIR1 RFAI<sup>AID 1-229</sup></i>                            | <i>DF5 URA3:: ADH1-AtTIR1<sup>9myc</sup> RFAI<sup>AID 1-229</sup>::hphB</i>                                                                               | This study                    |
| <i>TIR1 RFAI<sup>AID*-9myc</sup></i>                            | <i>DF5 URA3:: ADH1-AtTIR1<sup>9myc</sup> RFAI<sup>AID*-9myc</sup>::hphB</i>                                                                               | This study                    |
| <i>TIR1 RFAI<sup>AID*-6HA</sup></i>                             | <i>DF5 URA3:: ADH1-AtTIR1<sup>9myc</sup> RFAI<sup>AID*-6HA</sup>::hphB</i>                                                                                | This study                    |
| <i>TIR1 RFAI<sup>AID*-6FLAG</sup></i>                           | <i>DF5 URA3:: ADH1-AtTIR1<sup>9myc</sup> RFAI<sup>AID*-6FLAG</sup>::hphB</i>                                                                              | This study                    |
| <i>TIR1 RFAI<sup>AID*-GFP</sup></i>                             | <i>DF5 URA3:: ADH1-AtTIR1<sup>9myc</sup> RFAI<sup>AID*-GFP</sup>::hphB</i>                                                                                | This study                    |
| <i>TIR1 RFAI<sup>AID*-9myc (Kan)</sup></i>                      | <i>DF5 URA3:: ADH1-AtTIR1<sup>9myc</sup> RFAI<sup>AID*-9myc</sup>::KanMX</i>                                                                              | This study                    |
| <i>TIR1 RFAI<sup>AID*-9myc (Nat)</sup></i>                      | <i>DF5 URA3:: ADH1-AtTIR1<sup>9myc</sup> RFAI<sup>AID*-9myc</sup>::NatNT</i>                                                                              | This study                    |
| <i>TIR1 RFAI<sup>AID*-9myc (His)</sup></i>                      | <i>DF5 URA3:: ADH1-AtTIR1<sup>9myc</sup> RFAI<sup>AID*-9myc</sup>::HIS3MX</i>                                                                             | This study                    |
| <i>TIR1 P<sub>CUP1</sub><sup>AID*-9myc</sup> RFAI</i>           | <i>DF5 URA3:: ADH1-AtTIR1<sup>9myc</sup> P<sub>CUP1</sub><sup>AID*-9myc</sup> RFAI::KanMX</i>                                                             | This study                    |
| <i>TIR1 P<sub>CUP1</sub><sup>9myc-AID*(ATG)</sup> RFAI</i>      | <i>DF5 URA3:: ADH1-AtTIR1<sup>9myc</sup> P<sub>CUP1</sub><sup>9myc-AID*(ATG)</sup> RFAI::KanMX</i>                                                        | This study                    |
| <i>TIR1 P<sub>CUP1</sub><sup>9myc-AID*</sup> RFAI</i>           | <i>DF5 URA3:: ADH1-AtTIR1<sup>9myc</sup> P<sub>CUP1</sub><sup>9myc-AID*</sup> RFAI::KanMX</i>                                                             | This study                    |
| <i>TIR1 P<sub>CUP1</sub><sup>9myc-AID*</sup> RFAI</i>           | <i>DF5 URA3:: ADH1-AtTIR1<sup>9myc</sup> P<sub>CUP1</sub><sup>9myc-AID*</sup> RFAI::KanMX</i>                                                             | This study                    |
| <i>TIR1 Tet-RAD18 BrdU ORC6<sup>AID*-9myc</sup></i>             | <i>DF5 KanMX::TetO7-RAD18 LEU2::TetR'-SSN6 TRP::BrdU-inc URA3::ADH1-AtTIR1<sup>9myc</sup> ORC6<sup>AID*-9myc</sup>::hphB</i>                              | This study                    |
| <i>TIR1 Tet-RAD18 BrdU POL1<sup>AID*-9myc</sup></i>             | <i>DF5 KanMX::TetO7-RAD18 LEU2::TetR'-SSN6 TRP::BrdU-inc URA3::ADH1-AtTIR1<sup>9myc</sup> POL1<sup>AID*-9myc</sup>::hphB</i>                              | This study                    |
| <i>TIR1 Tet-RAD18 BrdU POL2<sup>AID*-9myc</sup></i>             | <i>DF5 KanMX::TetO7-RAD18 LEU2::TetR'-SSN6 TRP::BrdU-inc URA3::ADH1-AtTIR1<sup>9myc</sup> POL2<sup>AID*-9myc</sup>::hphB</i>                              | This study                    |
| <i>TIR1 Tet-RAD18 BrdU POL31<sup>AID*-9myc</sup></i>            | <i>DF5 KanMX::TetO7-RAD18 LEU2::TetR'-SSN6 TRP::BrdU-inc URA3::ADH1-AtTIR1<sup>9myc</sup> POL31<sup>AID*-9myc</sup>::hphB</i>                             | This study                    |
| <i>TIR1 Tet-RAD18 BrdU RFC1<sup>AID*-9myc</sup></i>             | <i>DF5 KanMX::TetO7-RAD18 LEU2::TetR'-SSN6 TRP::BrdU-inc URA3::ADH1-AtTIR1<sup>9myc</sup> RFC1<sup>AID*-9myc</sup>::hphB</i>                              | This study                    |
| <i>TIR1 P<sub>CUP1</sub><sup>9myc-AID*</sup> RFC1</i>           | <i>DF5 URA3:: ADH1-AtTIR1<sup>9myc</sup> P<sub>CUP1</sub><sup>9myc-AID*</sup> RFC1::KanMX</i>                                                             | This study                    |
| <i>TIR1 ASK1<sup>AID*-9myc</sup></i>                            | <i>DF5 URA3:: ADH1-AtTIR1<sup>9myc</sup> ASK1<sup>AID*-9myc</sup>::hphB</i>                                                                               | This study                    |
| <i>TIR1 SEC14<sup>AID*-9myc</sup></i>                           | <i>DF5 URA3:: ADH1-AtTIR1<sup>9myc</sup> SEC14<sup>AID*-9myc</sup>::hphB</i>                                                                              | This study                    |
| <i>TIR1 MMS2<sup>AID*-9myc</sup></i>                            | <i>DF5 URA3:: ADH1-AtTIR1<sup>9myc</sup> MMS2<sup>AID*-9myc</sup>::hphB</i>                                                                               | This study                    |
| <i>TIR1 UBC13<sup>AID*-9myc</sup></i>                           | <i>DF5 URA3:: ADH1-AtTIR1<sup>9myc</sup> UBC13<sup>AID*-9myc</sup>::hphB</i>                                                                              | This study                    |
| <i>TIR1 YEN1<sup>AID*-9myc</sup></i>                            | <i>DF5 URA3:: ADH1-AtTIR1<sup>9myc</sup> YEN1<sup>AID*-9myc</sup>::hphB</i>                                                                               | This study                    |

Note that those strains harbouring *Tet-Rad18 BrdU* were constructed from strains described in Daigaku *et al.*, *Nature* **465**: 951-955 (2010). The presence of these features is irrelevant to this study.
